# Supplementary figures and images for: CHANCE: comprehensive software for quality control and validation of ChIP-seq data
Source: Springer Nature journal article supplement (doi:10.1186/gb-2012-13-10-r98), 2012-10-15

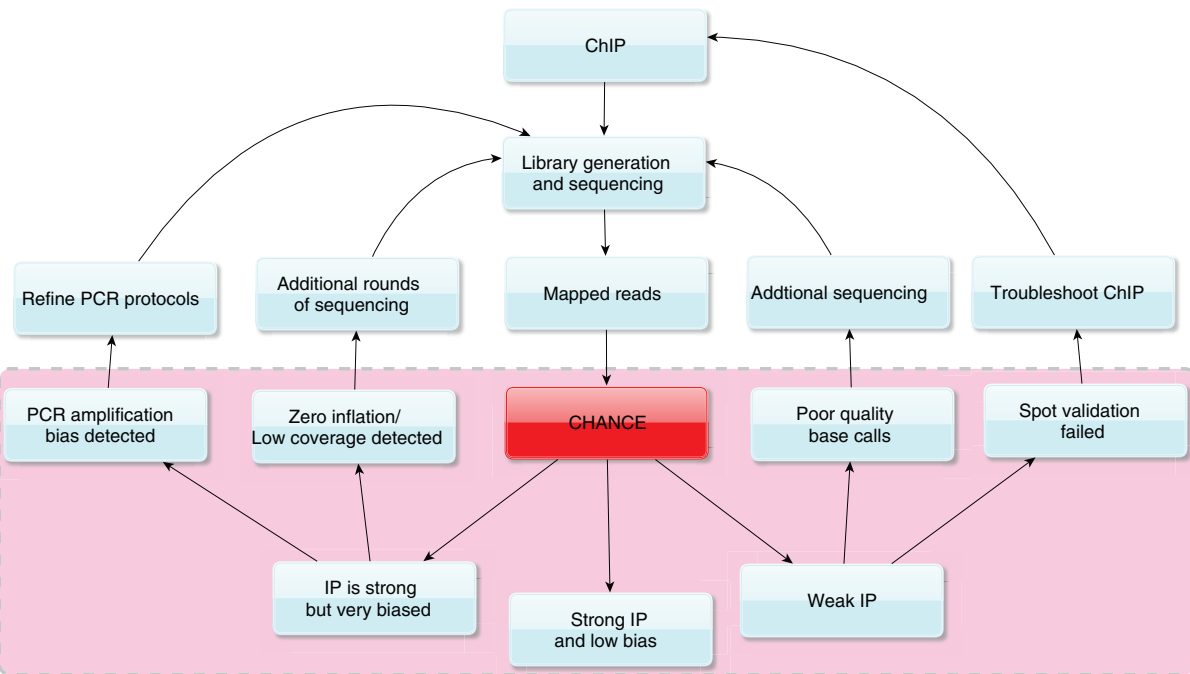

Supplement: 13059_2012_2969_MOESM10_ESM.pdf [file 13059_2012_2969_MOESM10_ESM.pdf]
